# Supplementary material
Source: MDPI journal article supplement (https://www.mdpi.com/1424-2818/13/6/274)
Supplement: s1 [file s1]

**Table S1.** Summary statistics for all the predictor (environmental) data.

| Country | Environmental Variable                             | Min    | Mean   | Maximum | Not Available Data (%) |
|---------|----------------------------------------------------|--------|--------|---------|------------------------|
| Italy   | Sea surface temperature (°C)                       | 7.75   | 22.35  | 29.19   | 11.85                  |
|         | Salinity                                           | 22.6   | 37.8   | 39.27   | 11.85                  |
|         | Chlorophyll a (mg m <sup>-3</sup> )                | 0.01   | 0.53   | 13.79   | 94.08                  |
|         | Phosphate (mmol m <sup>-3</sup> )                  | 0.01   | 0.02   | 0.08    | 98.65                  |
|         | Nitrate (mmol m <sup>-3</sup> )                    | 0.02   | 2.03   | 15.72   | 98.65                  |
|         | Dissolved molecular oxygen (mmol m <sup>-3</sup> ) | 181.81 | 197.73 | 212.46  | 98.65                  |
|         | Wind direction (East, m s <sup>-1</sup> )          | -3.07  | -0.59  | 3.12    | 95.05                  |
|         | Wind direction (North, m s <sup>-1</sup> )         | -2.45  | -0.72  | 2.66    | 95.05                  |
|         | Wind speed (m s <sup>-1</sup> )                    | 2.95   | 5.09   | 7.19    | 95.05                  |
|         | Current direction (East, m s <sup>-1</sup> )       | -0.64  | -0.01  | 0.31    | 11.8                   |
|         | Current direction (North, m s <sup>-1</sup> )      | -0.36  | 0.00   | 0.34    | 11.8                   |
|         | Current speed (m s <sup>-1</sup> )                 | 0.00   | 0.03   | 0.67    | 11.8                   |
|         | NPP (mol m <sup>-3</sup> s <sup>-1</sup> )         | 0.00   | 0.00   | 0.00    | 98.65                  |
|         | Pcb (mol m <sup>-3</sup> )                         | 0.00   | 0.00   | 0.00    | 98.65                  |
|         | Slope index                                        | 0.01   | 108.23 | 402.25  | 0                      |
| Malta   | Sea surface temperature (°C)                       | 14.52  | 22.75  | 29.09   | 0                      |
|         | Salinity                                           | 37.43  | 37.89  | 38.78   | 0                      |
|         | Chlorophyll a (mg m <sup>-3</sup> )                | 0.03   | 0.06   | 0.2     | 0                      |
|         | Phosphate (mmol m <sup>-3</sup> )                  | 0.01   | 0.01   | 0.03    | 0                      |
|         | Nitrate (mmol m <sup>-3</sup> )                    | 0.04   | 0.03   | 0.26    | 0                      |
|         | Dissolved molecular oxygen (mmol m <sup>-3</sup> ) | 182.98 | 202.83 | 230.56  | 0                      |
|         | Wind direction (East, m s <sup>-1</sup> )          | -9.95  | -0.35  | 9.8     | 32.49                  |
|         | Wind direction (North, m s <sup>-1</sup> )         | -2.52  | 0.36   | 7.17    | 32.49                  |
|         | Wind speed (m s <sup>-1</sup> )                    | 0.09   | 2.16   | 10.46   | 32.49                  |
|         | Current direction (East, m s <sup>-1</sup> )       | -0.47  | -0.02  | 0.09    | 0                      |
|         | Current direction (North, m s <sup>-1</sup> )      | -0.1   | 0.01   | 0.17    | 0                      |
|         | Current speed (m s <sup>-1</sup> )                 | 0.00   | 0.04   | 0.47    | 0                      |
|         | NPP (mol m <sup>-3</sup> s <sup>-1</sup> )         | 0.00   | 0.00   | 0.00    | 93.32                  |
|         | Pcb (mol m <sup>-3</sup> )                         | 0.00   | 0.00   | 0.00    | 93.32                  |
|         | Slope index                                        | 13.25  | 21.42  | 26.95   | 0                      |
| Spain   | Sea surface temperature (°C)                       | 15.09  | 23.48  | 28.02   | 0.15                   |
|         | Salinity                                           | 35.18  | 37.95  | 38.56   | 0.15                   |
|         | Chlorophyll a (mg m <sup>-3</sup> )                | 0.01   | 0.30   | 90.76   | 9.42                   |
|         | Phosphate (mmol m <sup>-3</sup> )                  | 0.01   | 0.02   | 0.18    | 27.88                  |
|         | Nitrate (mmol m <sup>-3</sup> )                    | 0.14   | 2.12   | 28.74   | 27.88                  |
|         | Dissolved molecular oxygen (mmol m <sup>-3</sup> ) | 176.88 | 205.20 | 241.02  | 27.88                  |
|         | Wind direction (East, m s <sup>-1</sup> )          | -9.65  | 0.04   | 8.96    | 13.79                  |
|         | Wind direction (North, m s <sup>-1</sup> )         | -15.52 | -0.35  | 11.56   | 13.79                  |
|         | Wind speed (m s <sup>-1</sup> )                    | 0.62   | 4.72   | 17.8    | 13.79                  |
|         | Current direction (East, m s <sup>-1</sup> )       | -0.24  | 0.01   | 0.23    | 0.15                   |
|         | Current direction (North, m s <sup>-1</sup> )      | -0.23  | 0.00   | 0.22    | 0.15                   |
|         | Current speed (m s <sup>-1</sup> )                 | 0.00   | 0.03   | 0.24    | 0.15                   |
|         | NPP (mol m <sup>-3</sup> s <sup>-1</sup> )         | 0.00   | 0.00   | 0.01    | 27.88                  |
|         | Pcb (mol m <sup>-3</sup> )                         | 0.00   | 0.00   | 0.01    | 27.88                  |
|         | Slope index                                        | 11.35  | 32.19  | 75.12   | 0.0                    |
| Tunisia | Sea surface temperature (°C)                       | 14.03  | 24.15  | 28.39   | 0.0                    |
|         | Salinity                                           | 37.05  | 37.82  | 38.53   | 0.0                    |
|         | Chlorophyll a (mg m <sup>-3</sup> )                | 0.01   | 0.05   | 0.42    | 0.0                    |
|         | Phosphate (mmol m <sup>-3</sup> )                  | 0.01   | 0.02   | 0.06    | 0.0                    |

| Country | Environmental Variable                             | Min    | Mean   | Maximum | Not Available Data (%) |
|---------|----------------------------------------------------|--------|--------|---------|------------------------|
| Italy   | Sea surface temperature (°C)                       | 7.75   | 22.35  | 29.19   | 11.85                  |
|         | Nitrate (mmol m <sup>-3</sup> )                    | 0.02   | 0.6    | 4.14    | 0.0                    |
|         | Dissolved molecular oxygen (mmol m <sup>-3</sup> ) | 169.38 | 195.45 | 239.96  | 0.0                    |
|         | Wind direction (East, m s <sup>-1</sup> )          | -9.95  | -0.45  | 7.17    | 0.0                    |
|         | Wind direction (North, m s <sup>-1</sup> )         | -8.57  | -0.71  | 7.49    | 0.0                    |
|         | Wind speed (m s <sup>-1</sup> )                    | 2.1    | 5.04   | 10.35   | 0.0                    |
|         | Current direction (East, m s <sup>-1</sup> )       | -0.08  | 0.00   | 0.26    | 0.0                    |
|         | Current direction (North, m s <sup>-1</sup> )      | -0.06  | 0.01   | 0.13    | 0.0                    |
|         | Current speed (m s <sup>-1</sup> )                 | 0.00   | 0.03   | 0.26    | 0.0                    |
|         | NPP (mol m <sup>-3</sup> s <sup>-1</sup> )         | 0.00   | 0.00   | 0.00    | 0.0                    |
|         | Pcb (mol m <sup>-3</sup> )                         | 0.00   | 0.00   | 0.00    | 0.0                    |
|         | Slope index                                        | 23.29  | 99.11  | 150.4   | 0.0                    |

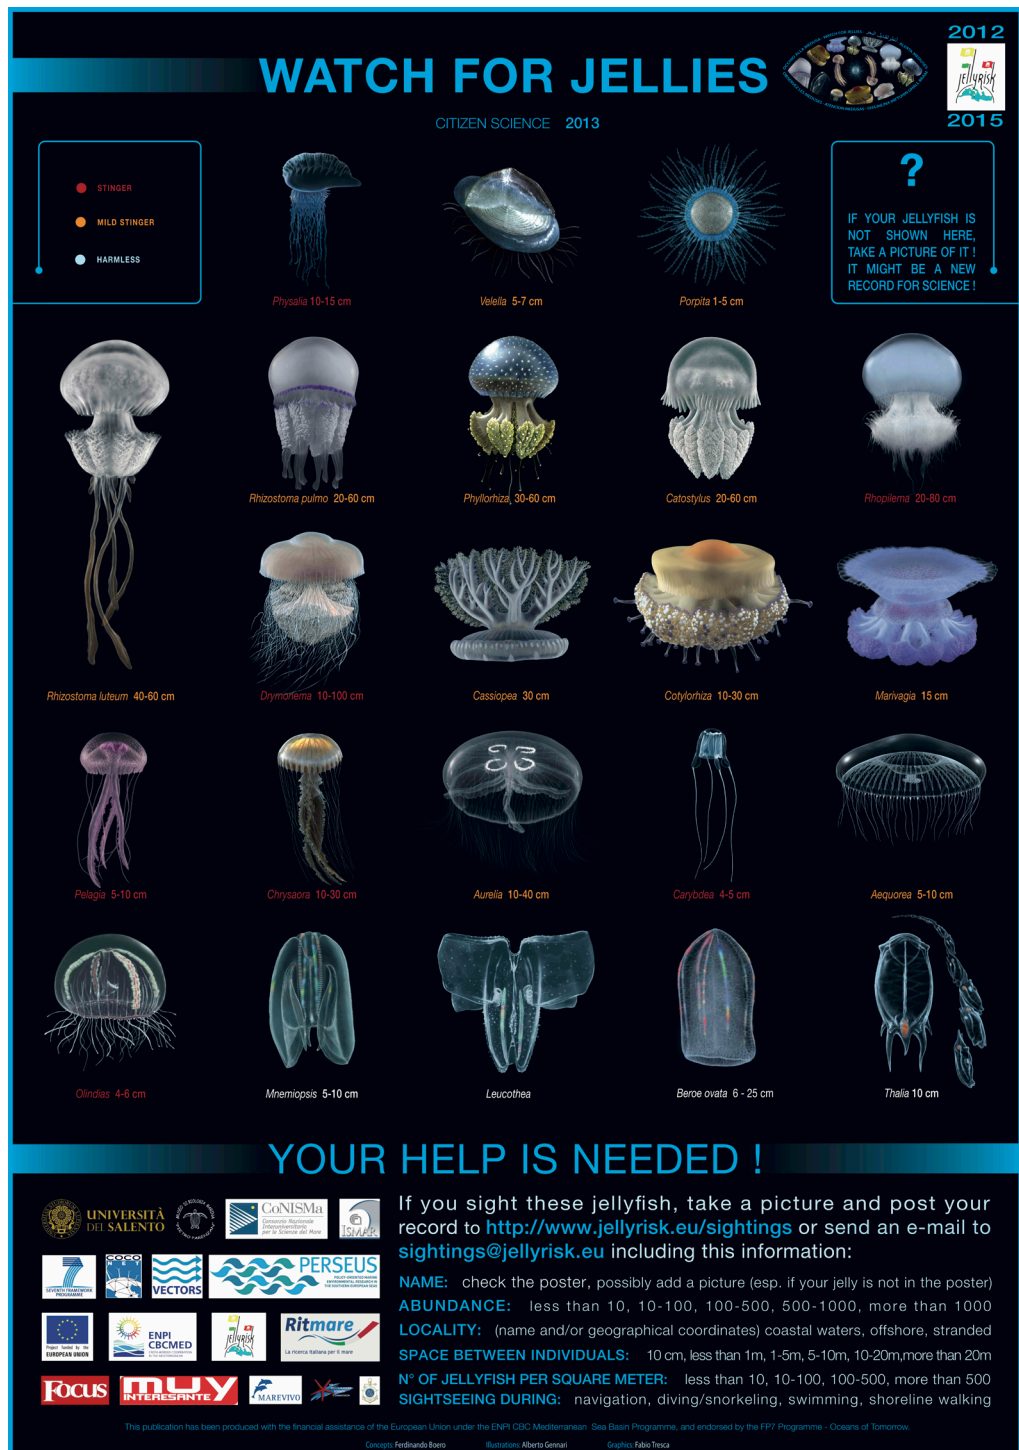

**Figure S1.** Poster “Watch for Jellies” (citizen science campaign) distributed within the MED-JELLYRISK project.

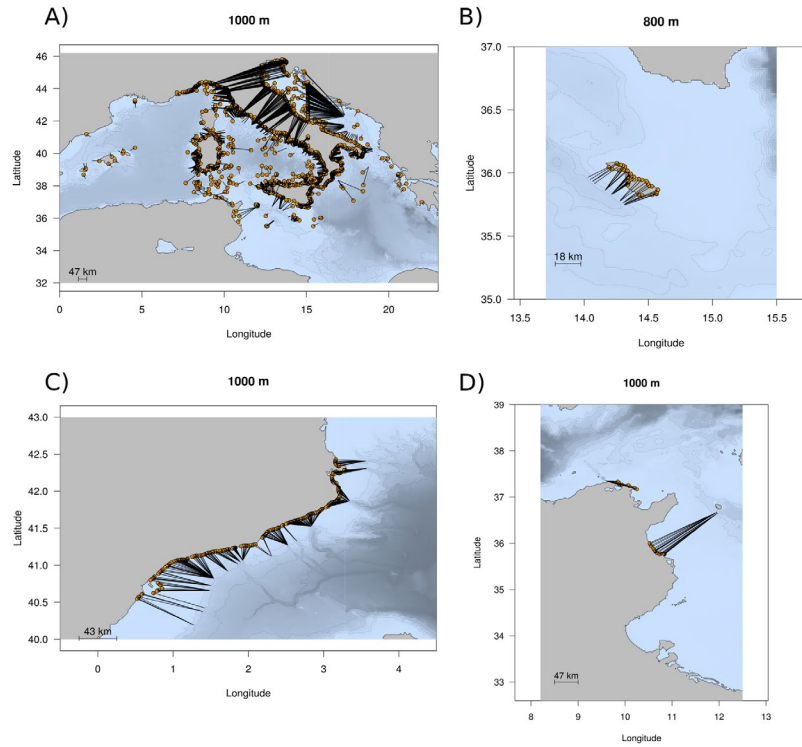

**Figure S2.** Map showing the distance to the nearest marine canyon (black lines) calculated as the distance (Km) to the nearest 1000 m depth isobath (except for Malta where 800 m was used) for each sampling site (yellow dots) and used as the “slope index” predictor variable. A) Italy, B) Malta, C) Spain and D) Tunisia

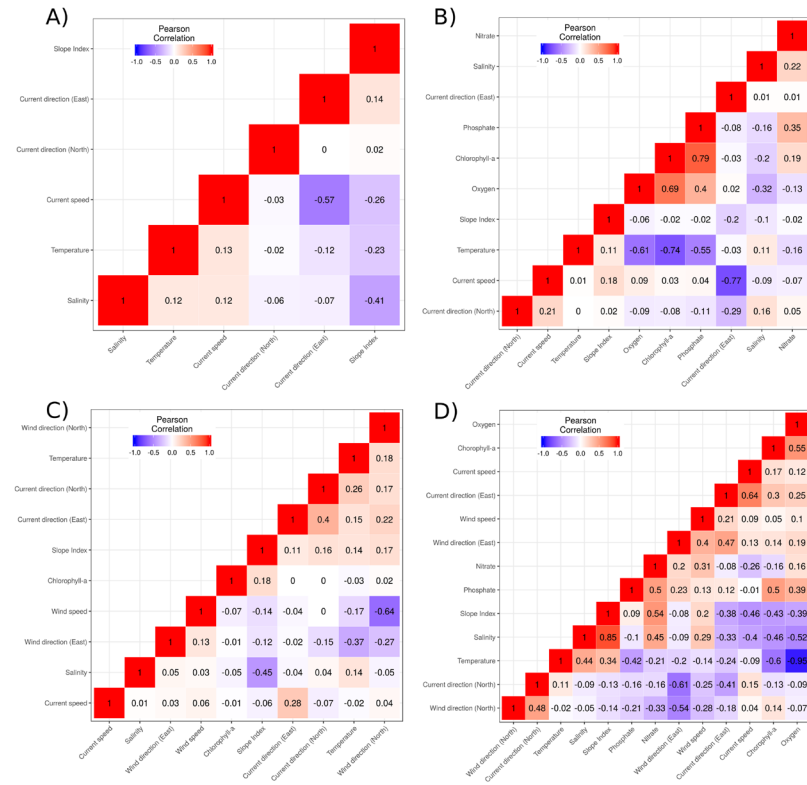

**Figure S3.** Collinearity analysis showing the Pearson correlation coefficient “rho” for each combination of available environmental (predictor) variables for A) Italy, B) Malta, C) Spain and D) Tunisia. Red and blue boxes denotes positive and negative correlation values, respectively.

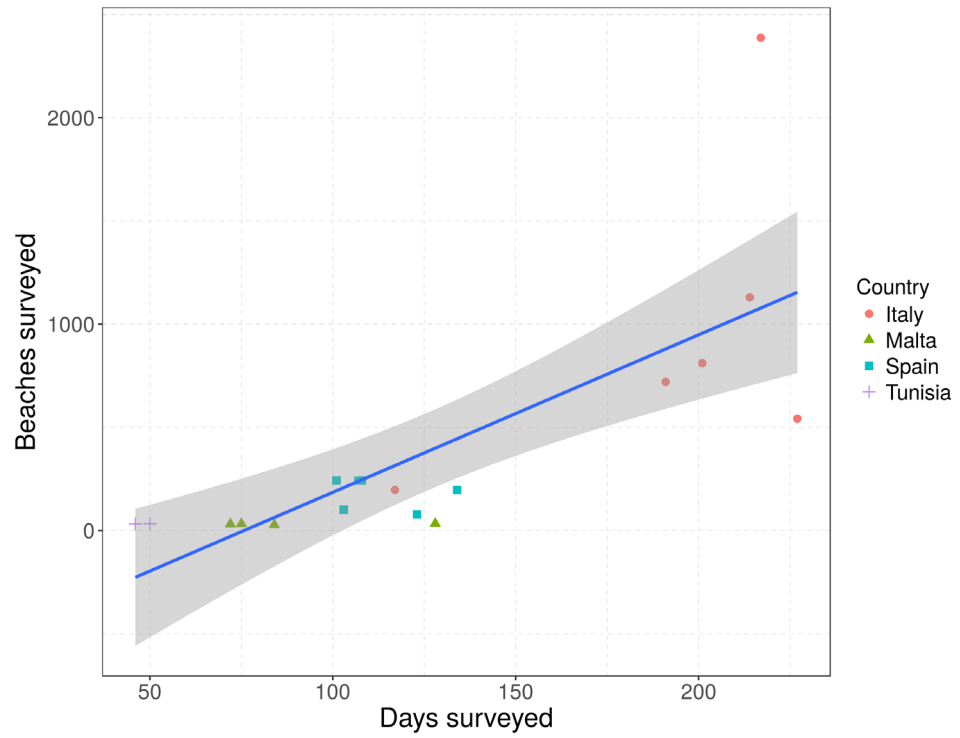

**Figure S4.** Positive association between the number of days surveyed and the spatial coverage represented by the number of beaches surveyed. Slope = 7.63, r-squared = 0.6, t-value = 4.73,  $p$ -value < 0.01.
